# Supplementary material
Source: publisher figshare collection journal article supplement (https://frontiersin.figshare.com/ndownloader/files/15100331)
Supplement: Supplementary file [file 15100331]

|                                                              |      |
|--------------------------------------------------------------|------|
| TAACAAGGGAATCCGATTTTTCCAGCTAGAAATTGAATGGCTATTGGCTT           | 1451 |
| GGCCCTTACTCTTCTGTCAATTGTCAAACCTTATCTTTGCT <u>GACACTTACA</u>  | 1401 |
| <b>b-1</b>                                                   |      |
| CTTTTAGGGAAGTGGCTCCTACCCTTCATGCATTAGGAACCGTTAGCTTT           | 1351 |
| ACTTGTAGATAGATTAGATATTTACCTATCTCTGCTAGAAGATTCTTATT           | 1301 |
| TTGGTTCCTTGATTCTTGTGGCTTCAAGTTTGAGACAAAATAAGCCATTA           | 1251 |
| ACTCGTACCCTGAAGAAGGAGAATTACTCGAACTTAATCAGAAGTAAATC           | 1201 |
| AGATATACTAGATAAAACATTTTTGCAAACAATTCTTATCTAGCCACTTT           | 1151 |
| GTGTGAATATATATATATTTCCCTTGCTTATTGTACTTGGAAGTAACTGCAG         | 1101 |
| CTGAATGGTGAATAAATGTTTTCCACAGTTTCTAGTAGGTTCAAGTAAGG           | 1051 |
| GCAATCAGATGCTCAGGGCAGAGATAAGATAACCCTTGCTAGGTCTTCCT           | 1001 |
| GGGACCAC <u>GAAAAA</u> TGCTTATCAACTAACTTCCAAATTTACAGTTTTGA   | 951  |
| <b>a-1</b>                                                   |      |
| TATTTTACATTTTCCCTAAGGATCTTGCAATTTTCATGAACGAAAGTTTGAG         | 901  |
| AGACAACCTTTTTTACCCTTCTGAACGTAATATAGATATGCCTTGTAAGAC          | 851  |
| AGGGAATTAGCAAGCTCCACATATTTTTTTTTCCCATGGAGATAAATCACT          | 801  |
| TGCAGAGTCTCTTCTTATTAGCTGTCAAAAAATATCTTCTAT <u>TGACCTAA</u>   | 751  |
| <b>b-3</b>                                                   |      |
| CTTACTCCCTTCTAACGTGCTGTGTAGCCAATGGACCACTTTTTGATATA           | 701  |
| ACTTTTCATACTCTTCTTGACAATGATCTCGGTTTTCCATGTTTAATTATG          | 651  |
| <b>b-4</b>                                                   |      |
| CCCCTTAATAACGGGTTATGCTGTTTGTATTATTGTAAATGTATATAGAA           | 601  |
| AACTTTGAATTGATGTTTGTAAAGATGTGATTGCATT <u>GAAAAA</u> TACATAA  | 551  |
| <b>a-2</b>                                                   |      |
| TATCACCTTCAAAGTCTCCCTTAAATTATGCAGAATTAGTAGTGTACAA            | 501  |
| TCAATCTATCATCTCTAATACCAACTGTTTGGATGGATACACCTACTGAAC          | 451  |
| GTTTCATTTAAGGAAGAGAAGCCTTTGCTTTCATCGAAACATTTATGATA           | 401  |
| CGCATGCACTCAATGAAAATTCCTGTTTCCCTTAATGCTAGCAGAAAGTCC          | 351  |
| AAGGTTGCATATATCAGGGATTTAAGTAGACATTTACCACAATTAATCTAT          | 301  |
| GATGGCATCTAAAATCCTGGAATATATATCAAAAAGCTGATGCTAGATTATA         | 251  |
| AGTCATTTTTCTGAATGTATAGATGCATGGCCATGGCTGAAACCTGATTC           | 201  |
| TCCTTGTAATAATGATAAACAGTAAAAACATATGT <u>TGACATGAGAAATGAAA</u> | 151  |
| <b>b-2</b>                                                   |      |
| ATTACCTGCAACAATTGGATGCAAAAAGATATTTTTTTTCCAATCCAAAAGA         | 101  |
| GTATTCTTGTGTTTTCTGAGAAAAATTTTCCCTCTAATTCACATGCATCA           | 51   |
| CTGCTTCAAAATCTGTGCT <u>TGTCACATAGGGAATCAGTCTCATCATCAT</u>    | 1    |
| <b>c-1</b>                                                   |      |

Supplementary Figure 3. A sequence of 1500 bp promoter of *GhABP19* and putative regulative elements. a, GT-1 box; b, W-box and c, silencing element binding factor. The numbers correspond to those in Table 2.
